## CORRECTION

# Correction: Two distinct ontogenies confer heterogeneity to mouse brain microglia (doi: 10.1242/dev.152306)

**Shrutokirti De, Donn Van Deren, Eric Peden, Matt Hockin, Anne Boulet, Simon Titen and Mario R. Capecchi**

RNA-seq data associated with *Development* (2018) **145**, dev152306 (doi: 10.1242/dev.152306) are now available in GEO under accession number GSE124710.

The inserted Data availability section is shown below, and both the online full-text and PDF versions have been updated.

### **Data availability**

RNA-seq data have been deposited in GEO under accession number GSE124710.

The authors apologise to readers for this omission.
